# Supplementary material for: Facile construction of an Ag/MoSe2 composite based non-enzymatic amperometric sensor for hydrogen peroxide
Source: Royal Society of Chemistry journal article supplement (doi:10.1039/d2dt00118g), 2022-01-01
Supplement: d2dt00118g1.pdf [file d2dt00118g1.pdf]

## A facile construction of Ag/MoSe<sub>2</sub> composite based non-enzymatic amperometric sensor for hydrogen peroxide

Ran Tian, Dong Li, Tao Zhou, Xue-Qiang Chu, Danhua Ge\*, Xiaojun Chen\*

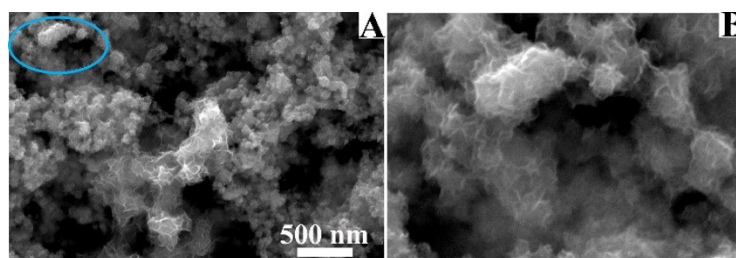

Fig. S1 (A) SEM image of MoSe<sub>2</sub>. (B) Enlarged blue area in (A).

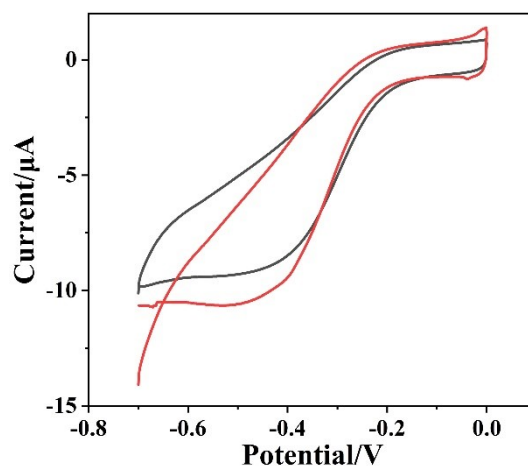

Fig. S2 CVs of Ag NPs modified ITO electrode in absence (black line) and presence (red line) of 1 mM H<sub>2</sub>O<sub>2</sub>.

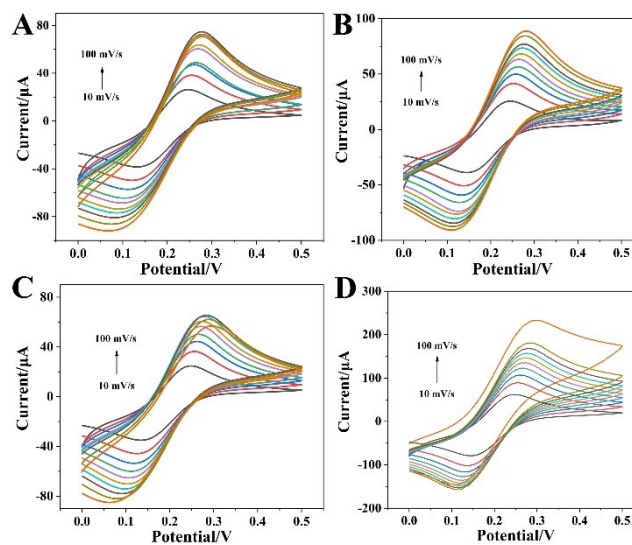

Fig. S3 CVs of (A) bare ITO, (B) MoSe<sub>2</sub>, (C) MoSe<sub>2</sub>-500 and (D) Ag/MoSe<sub>2</sub>-500 modified ITO

electrodes in 0.1 M KCl solution containing 5 mM  $K_3[Fe(CN)_6]$ .

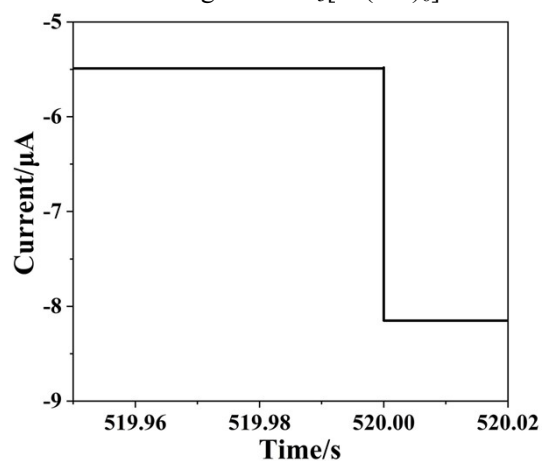

Fig. S4 The response time of Ag/MoSe<sub>2</sub>-500/ITO.

**Table S1.** The recovery of H<sub>2</sub>O<sub>2</sub> by standard addition method in milk and orange juice.

| Sample       | Added concentration/mM | Measured concentration/mM | Recovery/% |
|--------------|------------------------|---------------------------|------------|
| Milk         | 0.04                   | 0.04                      | 100.0      |
|              | 0.46                   | 0.46                      | 100.0      |
|              | 0.66                   | 0.64                      | 97.0       |
| Orange juice | 0.26                   | 0.25                      | 96.2       |
|              | 0.46                   | 0.51                      | 110.9      |
|              | 0.66                   | 0.63                      | 95.5       |
